# Supplementary material
Source: publisher figshare collection journal article supplement (https://acs.figshare.com/ndownloader/files/4276254)
Supplement: Supplementary file 1 [file 4276254]

data_ban1023


# 1. SUBMISSION DETAILS                                                       
_publ_requested_journal          J.Org.Chem.
_publ_contact_author_name        'Martin G. Banwell'

_publ_contact_author_address     
;
Research School of Chemistry,
Australian National University,
Canberra, ACT 0200, Australia
;
_publ_contact_author_email       'mgb@rsc.anu.edu.au '
_publ_contact_author_phone       ' 61 2 6125 8202 '
_publ_contact_author_fax         ' 61 2 6125 8114 '
loop_
_publ_author_name
_publ_author_address
'White, Lorenzo V.'
;
Research School of Chemistry,
The Australian National University,
Canberra, ACT 0200, Australia
;
'Schwartz, Brett D.'
;
Research School of Chemistry,
The Australian National University,
Canberra, ACT 0200, Australia
;
'Banwell, Martin G.'
;
Research School of Chemistry,
The Australian National University,
Canberra, ACT 0200, Australia
;
'Willis, Anthony C.'
;
Research School of Chemistry,
The Australian National University,
Canberra, ACT 0200, Australia
;
_audit_creation_date             10-11-30
_audit_creation_method           CRYSTALS_ver_12.87
_audit_update_record             
;
2010-12-01 - Report on C19 H21 N O9 
             by Anthony C. Willis
             for   Lorenzo White and Martin Banwell

2010-12-02 - passes checkcif tests with few warnings  
;

_oxford_structure_analysis_title '11301512 ban1023 scalepack'
_chemical_name_systematic        ?
_chemical_melting_point          ?


_cell_length_a                   7.8532(4)
_cell_length_b                   7.8328(4)
_cell_length_c                   15.1100(8)
_cell_angle_alpha                90
_cell_angle_beta                 93.534(3)
_cell_angle_gamma                90
_cell_volume                     927.69(8)

_symmetry_cell_setting           Monoclinic
_symmetry_space_group_name_H-M   'P 1 21 1 '
_symmetry_space_group_name_Hall  ?
loop_
_symmetry_equiv_pos_as_xyz
x,y,z
-x,y+1/2,-z

loop_
_atom_type_symbol
_atom_type_scat_dispersion_real
_atom_type_scat_dispersion_imag
_atom_type_scat_Cromer_Mann_a1
_atom_type_scat_Cromer_Mann_b1
_atom_type_scat_Cromer_Mann_a2
_atom_type_scat_Cromer_Mann_b2
_atom_type_scat_Cromer_Mann_a3
_atom_type_scat_Cromer_Mann_b3
_atom_type_scat_Cromer_Mann_a4
_atom_type_scat_Cromer_Mann_b4
_atom_type_scat_Cromer_Mann_c
_atom_type_scat_source
C 0.0033 0.0016 2.3100 20.8439 1.0200 10.2075 1.5886 0.5687 0.8650 51.6512
0.2156 'International Tables Vol C 4.2.6.8 and 6.1.1.4'
H 0.0000 0.0000 0.4930 10.5109 0.3229 26.1257 0.1402 3.1424 0.0408 57.7998
0.0030 'International Tables Vol C 4.2.6.8 and 6.1.1.4'
N 0.0061 0.0033 12.2126 0.0057 3.1322 9.8933 2.0125 28.9975 1.1663 0.5826
-11.5290 'International Tables Vol C 4.2.6.8 and 6.1.1.4'
O 0.0106 0.0060 3.0485 13.2771 2.2868 5.7011 1.5463 0.3239 0.8670 32.9089
0.2508 'International Tables Vol C 4.2.6.8 and 6.1.1.4'


_cell_formula_units_Z            2

# Given Formula = C19 H21 N1 O9 
# Dc =      1.46 Fooo =    428.00 Mu =      1.17 M =    407.38
# Found Formula = C19 H21 N1 O9 
# Dc =      1.46 FOOO =    428.00 Mu =      1.17 M =    407.38

_chemical_formula_sum            'C19 H21 N O9'
_chemical_formula_moiety         'C17 H20 N O5 +, C2 H O4 -'
_chemical_compound_source        local
_chemical_formula_weight         407.38


_cell_measurement_reflns_used    19915
_cell_measurement_theta_min      2.6
_cell_measurement_theta_max      25
_cell_measurement_temperature    200

_exptl_crystal_description       lath
_exptl_crystal_colour            colourless
_exptl_crystal_size_min          0.030
_exptl_crystal_size_mid          0.070
_exptl_crystal_size_max          0.420

_exptl_crystal_density_diffrn    1.458
_exptl_crystal_density_meas      ?
_exptl_crystal_density_method    'not measured'
# Non-dispersive F(000): 
_exptl_crystal_F_000             428
_exptl_absorpt_coefficient_mu    0.117

# Sheldrick geometric approximatio 0.99 1.00 
_exptl_absorpt_correction_type   multi-scan
_exptl_absorpt_process_details   'DENZO/SCALEPACK (Otwinowski & Minor, 1997)'
_exptl_absorpt_correction_T_min  0.908 # 0.996*9.64/10.57 
_exptl_absorpt_correction_T_max  0.996 # 1.00 
# For a Kappa CCD, set Tmin to 1.0 and 
# Tmax to the ratio of max:min frame scales in scale_all.log 
_diffrn_measurement_device       'Nonius KappaCCD'
_diffrn_measurement_device_type  Area
_diffrn_radiation_monochromator  graphite
_diffrn_radiation_type           'Mo K\a'
_diffrn_radiation_wavelength     0.71073
_diffrn_measurement_method       ' \f and \w scans with CCD '
_diffrn_special_details          
;
CCD data collecting conditions-
phi and omega scans of width 1.8 deg at rate 324 sec/frame,
crystal-detector distance 28mm,
multiple scan sets so over 90 percent of data collected with 4-fold  
redundancy or more (assuming Friedel's Law].
;

# If a reference occurs more than once, delete the author 
# and date from subsequent references. 
_computing_data_collection       'COLLECT (Nonius, 2001).'
_computing_cell_refinement       'DENZO/SCALEPACK (Otwinowski & Minor, 1997)'
_computing_data_reduction        'DENZO/SCALEPACK (Otwinowski & Minor, 1997)'
_computing_structure_solution    'SIR92 (Altomare et al., 1994)'
_computing_structure_refinement  'CRYSTALS (Betteridge et al., 2003)'
_computing_publication_material  'CRYSTALS (Betteridge et al., 2003)'
_computing_molecular_graphics    
; 
ORTEP-II (Johnson 1976) in teXsan (MSC, 1992-1997)
;

_diffrn_standards_interval_time  .
_diffrn_standards_interval_count .
_diffrn_standards_number         0
_diffrn_standards_decay_%        ?

_diffrn_ambient_temperature      200
_diffrn_reflns_number            11514
_reflns_number_total             1761
_diffrn_reflns_av_R_equivalents  0.039
# Number of reflections without Friedels Law is 0 
# Number of reflections with Friedels Law is 1761 
# Theoretical number of reflections is about 3269 


_diffrn_reflns_theta_min         2.701
_diffrn_reflns_theta_max         25.004
_diffrn_measured_fraction_theta_max 0.997

_diffrn_reflns_theta_full        25.004
_diffrn_measured_fraction_theta_full 0.997


_diffrn_reflns_limit_h_min       -9
_diffrn_reflns_limit_h_max       9
_diffrn_reflns_limit_k_min       -9
_diffrn_reflns_limit_k_max       8
_diffrn_reflns_limit_l_min       -17
_diffrn_reflns_limit_l_max       17
_reflns_limit_h_min              -9
_reflns_limit_h_max              9
_reflns_limit_k_min              0
_reflns_limit_k_max              9
_reflns_limit_l_min              0
_reflns_limit_l_max              17

_oxford_diffrn_Wilson_B_factor   3.26
_oxford_diffrn_Wilson_scale      0.79

_atom_sites_solution_primary     direct #heavy,direct,difmap,geom
# _atom_sites_solution_secondary  difmap
_atom_sites_solution_hydrogens   geom

_refine_diff_density_min         -0.21
_refine_diff_density_max         0.18


# The current dictionary definitions do not cover the 
# situation where the reflections used for refinement were 
# selected by a user-defined sigma threshold 


# The values actually used during refinement 
_oxford_reflns_threshold_expression_ref I>-10.0\s(I)
_refine_ls_number_reflns         1761
_refine_ls_number_restraints     1
_refine_ls_number_parameters     271
_oxford_refine_ls_R_factor_ref   0.0386
_refine_ls_wR_factor_ref         0.0863
_refine_ls_goodness_of_fit_ref   1.0314
_refine_ls_shift/su_max          0.0024067
_refine_ls_shift/su_mean         0.2743846


# The values computed from all data 
_oxford_reflns_number_all        1761
_refine_ls_R_factor_all          0.0386
_refine_ls_wR_factor_all         0.0863

# The values computed with a 2 sigma cutoff - a la SHELX 
_reflns_threshold_expression     I>2.0\s(I)
_reflns_number_gt                1629
_refine_ls_R_factor_gt           0.0345
_refine_ls_wR_factor_gt          0.0830

# choose from: rm (reference molecule of known chirality), 
# ad (anomolous dispersion - Flack), rmad (rm and ad), 
# syn (from synthesis), unk (unknown) or . (not applicable). 
_chemical_absolute_configuration syn
_refine_ls_abs_structure_details 
;
The enantiomer has been assigned by reference to an unchanging chiral
centre in the synthetic procedure.
;


_refine_ls_structure_factor_coef Fsqd
_refine_ls_matrix_type           full
_refine_ls_hydrogen_treatment    mixed # none, undef, noref, refall,
# refxyz, refU, constr or mixed
_refine_ls_weighting_scheme      calc
_refine_ls_weighting_details     
;
 Method= Modified Sheldrick 
 w=1/[\s^2^(F^2^) + ( 0.05P)^2^ + 0.23P] 
 ,where P=(max(Fo^2^,0) + 2Fc^2^)/3 
;
_publ_requested_category         FO
_publ_contact_letter             
;
    ENTER TEXT OF LETTER
;

_publ_requested_coeditor_name    ?

#=============================================================================  
# 2. PROCESSING SUMMARY (IUCr Office Use Only)                                  
_journal_date_recd_electronic    ?
_journal_date_to_coeditor        ?
_journal_date_from_coeditor      ?
_journal_date_accepted           ?
_journal_date_printers_first     ?
_journal_date_printers_final     ?
_journal_date_proofs_out         ?
_journal_date_proofs_in          ?
_journal_coeditor_name           ?
_journal_coeditor_code           ?
_journal_coeditor_notes          
;                                                                               
                                  ?                                             
;
_journal_techeditor_code         ?
_journal_techeditor_notes        
;                                                                               
                                  ?                                             
;
_journal_coden_ASTM              ?
_journal_name_full               ?
_journal_year                    ?
_journal_volume                  ?
_journal_issue                   ?
_journal_page_first              ?
_journal_page_last               ?
_journal_suppl_publ_number       ?
_journal_suppl_publ_pages        ?
#=============================================================================  
# 3. TITLE AND AUTHOR LIST                                                      
_publ_section_title              
;                                                                               
A Chemoenzymatic Total Synthesis of (+)-Clividine
;
#============================================================================== 
# 4. TEXT                                                                       
_publ_section_abstract           
#Text of the abstract                                   
;                                                                               
The crystal structure of C~19~H~21~NO~9~
 is reported.
;
_publ_section_comment            
#Text of the paper                                       
;                                                                               
 
The crystallographic asymmetric unit consists of
one C~17~H~20~NO~5~^+^ cation
and one oxalate anion.


;
_publ_section_acknowledgements   
# Acknowledgments                               
;                                                                               
?                                                                               
;
_publ_section_figure_captions    
#Captions to figures                             
;                                                                               
?                                                                               
;
_publ_section_exptl_refinement   
# see also _refine_ls_hydrogen for refinement keywords.                         
;                                                                               
The compound is enantiometrically pure but 
 the anomolous dispersion terms are very low
for all elements in the structure and so the 
absolute configuration can not be determined in this experiment.
Consequently Friedel-pair reflections have been averaged and
the Flack parameter has not been refined.
The absolute configuration of the molecule has been assigned on the basis of 
the synthetic precursors.

H atoms bonded to C were included 
at geometrically determined positions
and those on N1, O22 and O29 at the positions
 indicated in a difference electron density map.
H atoms were initially refined with soft restraints on the 
bond lengths and angles to regularise their geometry 
(C---H in the range 0.93--0.98,
N---H in the range 0.86--0.89
 and O---H 0.82\%A) and 
U~iso~(H) (in the range 1.2-1.5 times U~eq~ of the parent atom). 
Later, the positions of the H atoms on N and O were refined without restraints
and the H atoms on C were constrained 
to ride on the atom to which they were attached.


The largest features in the final difference electron density map 
are located randomly through the structure.

;
_publ_section_exptl_prep         
;                                                                               
 The compound was prepared by LVW.
The sample ID is LW-5-Cliv.
;


# Insert your own references if required - in alphabetical order 
_publ_section_references         
; 
Altomare, A., Cascarano, G., Giacovazzo, G., Guagliardi, A., Burla, M.C., 
Polidori, G. & Camalli, M. (1994). J. Appl. Cryst. 27, 435. 
 
Betteridge, P.W., Carruthers, J.R., Cooper, R.I., 
Prout, K. & Watkin, D.J. (2003). J. Appl. Cryst. 36, 1487. 
 
Flack, H. D. (1983). Acta Cryst. A39, 876-881. 
 
Nonius (1997-2001). COLLECT. Nonius BV, Delft, The Netherlands. 
 
Otwinowski, Z. & Minor, W. (1997). Methods in Enzymology, Vol. 276, 
edited by C. W. Carter Jr & R. M. Sweet, pp. 307--326. 
New York: Academic Press. 
 

Mackay, S., Gilmore, C. J.,Edwards, C., Stewart, N. & Shankland, K.
(2000). maXus  Computer Program for the Solution and Refinement of
Crystal Structures. Nonius, The Netherlands, MacScience, Japan & The
University of Glasgow.

Coppens, P. (1970).  The Evaluation of Absorption and Extinction in
Single-Crystal Structure Analysis.  Crystallographic Computing.  F. R. Ahmed,
S. R. Hall and C. P. Huber, eds., Munksgaard. Copenhagen. pp 255-270.

Molecular Structure Corporation. (1992-1997). teXsan. 
Single Crystal Structure Analysis Software. Version 1.8.
MSC, 3200 Research Forest Drive, The Woodlands, TX 77381, USA.

Johnson, C.K. (1976)
ORTEP-II, A Fortran Thermal-Ellipsoid Plot Program, Report ORNL-5138, 
Oak Ridge National Laboratory, Oak Ridge, Tennessee, USA.
;


# Uequiv = arithmetic mean of Ui i.e. Ueqiv = (U1+U2+U3)/3

# Replace last . with number of unfound hydrogen atomsattached to an atom.

# ..._refinement_flags_... 
# . no refinement constraints           S special position constraint on site
# G rigid group refinement of site      R riding atom
# D distance or angle restraint on site T thermal displacement constraints
# U Uiso or Uij restraint (rigid bond)  P partial occupancy constraint


loop_
_atom_site_label
_atom_site_type_symbol
_atom_site_fract_x
_atom_site_fract_y
_atom_site_fract_z
_atom_site_U_iso_or_equiv
_atom_site_occupancy
_atom_site_adp_type
_atom_site_refinement_flags_posn
_atom_site_refinement_flags_adp
_atom_site_refinement_flags_occupancy
_atom_site_disorder_assembly
_atom_site_disorder_group
_oxford_atom_site_special_shape
_atom_site_attached_hydrogens
N1 N 0.3211(3) 0.3222(3) 0.20571(14) 0.0339 1.0000 Uani . . . . . . .
C2 C 0.3612(4) 0.1714(4) 0.1470(2) 0.0472 1.0000 Uani . . . . . . .
C3 C 0.5549(4) 0.1704(4) 0.1410(2) 0.0475 1.0000 Uani . . . . . . .
C4 C 0.6211(4) 0.3238(4) 0.19623(19) 0.0409 1.0000 Uani . . . . . . .
C5 C 0.6398(4) 0.4836(4) 0.1394(2) 0.0443 1.0000 Uani . . . . . . .
C6 C 0.6584(4) 0.6466(4) 0.19420(19) 0.0431 1.0000 Uani . . . . . . .
C7 C 0.5067(3) 0.6603(4) 0.25088(18) 0.0349 1.0000 Uani . . . . . . .
C8 C 0.5049(3) 0.5133(4) 0.31621(17) 0.0319 1.0000 Uani . . . . . . .
C9 C 0.4853(3) 0.3452(4) 0.26422(17) 0.0332 1.0000 Uani . . . . . . .
C10 C 0.1595(3) 0.2963(4) 0.25110(19) 0.0419 1.0000 Uani . . . . . . .
C11 C 0.3852(3) 0.5455(4) 0.38924(17) 0.0308 1.0000 Uani . . . . . . .
C12 C 0.3302(3) 0.4116(4) 0.44253(17) 0.0335 1.0000 Uani . . . . . . .
C13 C 0.2323(3) 0.4562(4) 0.51133(18) 0.0354 1.0000 Uani . . . . . . .
O14 O 0.1634(3) 0.3472(3) 0.57048(12) 0.0443 1.0000 Uani . . . . . . .
C15 C 0.1005(4) 0.4575(4) 0.63786(19) 0.0427 1.0000 Uani . . . . . . .
O16 O 0.0893(3) 0.6263(3) 0.60161(14) 0.0514 1.0000 Uani . . . . . . .
C17 C 0.1894(3) 0.6232(4) 0.52926(18) 0.0367 1.0000 Uani . . . . . . .
C18 C 0.2415(4) 0.7551(4) 0.48019(19) 0.0380 1.0000 Uani . . . . . . .
C19 C 0.3422(3) 0.7141(4) 0.40869(18) 0.0338 1.0000 Uani . . . . . . .
C20 C 0.4122(3) 0.8578(4) 0.36005(18) 0.0352 1.0000 Uani . . . . . . .
O21 O 0.5136(2) 0.8259(3) 0.29335(13) 0.0395 1.0000 Uani . . . . . . .
O22 O 0.8074(3) 0.6425(4) 0.25263(15) 0.0557 1.0000 Uani . . . . . . .
O23 O 0.3876(3) 1.0064(3) 0.37898(14) 0.0496 1.0000 Uani . . . . . . .
C24 C 0.1253(3) 0.6741(5) 0.10230(18) 0.0433 1.0000 Uani . . . . . . .
C25 C 0.0238(4) 0.7785(4) 0.0311(2) 0.0445 1.0000 Uani . . . . . . .
O26 O 0.1112(3) 0.7112(4) 0.18098(14) 0.0596 1.0000 Uani . . . . . . .
O27 O 0.2198(3) 0.5582(3) 0.07331(14) 0.0502 1.0000 Uani . . . . . . .
O28 O 0.0487(3) 0.7672(4) -0.04648(15) 0.0740 1.0000 Uani . . . . . . .
O29 O -0.0933(4) 0.8766(4) 0.06255(16) 0.0660 1.0000 Uani . . . . . . .
H11 H 0.297(4) 0.415(5) 0.166(2) 0.0508 1.0000 Uiso . . . . . . .
H21 H 0.3228 0.0650 0.1730 0.0557 1.0000 Uiso R . . . . . .
H22 H 0.3042 0.1927 0.0890 0.0560 1.0000 Uiso R . . . . . .
H31 H 0.6025 0.0649 0.1662 0.0568 1.0000 Uiso R . . . . . .
H32 H 0.5829 0.1808 0.0788 0.0570 1.0000 Uiso R . . . . . .
H41 H 0.7301 0.2928 0.2282 0.0490 1.0000 Uiso R . . . . . .
H51 H 0.7441 0.4691 0.1067 0.0533 1.0000 Uiso R . . . . . .
H52 H 0.5408 0.4954 0.0955 0.0525 1.0000 Uiso R . . . . . .
H61 H 0.6606 0.7467 0.1550 0.0515 1.0000 Uiso R . . . . . .
H71 H 0.4016 0.6590 0.2137 0.0414 1.0000 Uiso R . . . . . .
H81 H 0.6201 0.5061 0.3448 0.0374 1.0000 Uiso R . . . . . .
H91 H 0.4943 0.2496 0.3065 0.0401 1.0000 Uiso R . . . . . .
H101 H 0.1338 0.3986 0.2826 0.0621 1.0000 Uiso R . . . . . .
H102 H 0.1765 0.2020 0.2920 0.0625 1.0000 Uiso R . . . . . .
H103 H 0.0708 0.2700 0.2066 0.0619 1.0000 Uiso R . . . . . .
H121 H 0.3604 0.2983 0.4315 0.0394 1.0000 Uiso R . . . . . .
H151 H 0.1851 0.4571 0.6890 0.0495 1.0000 Uiso R . . . . . .
H152 H -0.0132 0.4193 0.6536 0.0514 1.0000 Uiso R . . . . . .
H181 H 0.2123 0.8699 0.4919 0.0455 1.0000 Uiso R . . . . . .
H221 H 0.892(5) 0.664(7) 0.224(3) 0.0832 1.0000 Uiso . . . . . . .
H291 H -0.152(6) 0.945(7) 0.011(3) 0.0997 1.0000 Uiso . . . . . . .

loop_
_atom_site_aniso_label
_atom_site_aniso_U_11
_atom_site_aniso_U_22
_atom_site_aniso_U_33
_atom_site_aniso_U_23
_atom_site_aniso_U_13
_atom_site_aniso_U_12
N1 0.0390(12) 0.0301(12) 0.0327(11) 0.0011(10) 0.0023(9) -0.0011(10)
C2 0.0595(18) 0.0363(15) 0.0456(16) -0.0079(14) 0.0010(14) -0.0006(15)
C3 0.0602(18) 0.0385(16) 0.0450(16) -0.0052(14) 0.0132(14) 0.0034(15)
C4 0.0402(15) 0.0424(17) 0.0408(15) -0.0023(13) 0.0089(12) 0.0049(13)
C5 0.0435(16) 0.0473(18) 0.0434(16) -0.0012(14) 0.0129(13) -0.0037(14)
C6 0.0441(15) 0.0444(18) 0.0418(15) 0.0015(14) 0.0102(12) -0.0047(14)
C7 0.0383(14) 0.0305(15) 0.0361(14) 0.0007(12) 0.0035(11) -0.0029(11)
C8 0.0290(12) 0.0323(14) 0.0345(13) 0.0034(12) 0.0021(10) 0.0003(11)
C9 0.0343(13) 0.0335(14) 0.0318(13) 0.0029(12) 0.0014(11) 0.0029(12)
C10 0.0372(14) 0.0481(18) 0.0403(15) 0.0020(13) 0.0003(12) -0.0056(13)
C11 0.0313(13) 0.0322(14) 0.0285(13) 0.0007(11) -0.0006(11) -0.0003(11)
C12 0.0391(14) 0.0290(14) 0.0322(13) -0.0013(11) 0.0010(11) 0.0005(11)
C13 0.0384(14) 0.0360(15) 0.0316(13) 0.0027(12) 0.0006(11) -0.0026(12)
O14 0.0572(12) 0.0417(12) 0.0352(10) 0.0022(9) 0.0121(9) -0.0035(11)
C15 0.0495(16) 0.0432(17) 0.0361(15) 0.0013(13) 0.0087(12) 0.0025(14)
O16 0.0613(13) 0.0508(13) 0.0442(11) 0.0061(10) 0.0202(10) 0.0150(11)
C17 0.0362(14) 0.0413(16) 0.0331(14) -0.0008(13) 0.0053(11) 0.0065(12)
C18 0.0440(15) 0.0323(14) 0.0377(15) -0.0005(12) 0.0023(12) 0.0072(12)
C19 0.0356(13) 0.0316(14) 0.0339(13) 0.0023(11) -0.0016(10) 0.0024(11)
C20 0.0390(14) 0.0289(14) 0.0371(15) 0.0022(12) -0.0014(11) 0.0025(12)
O21 0.0424(10) 0.0325(10) 0.0440(11) 0.0027(9) 0.0069(9) -0.0050(9)
O22 0.0378(11) 0.0731(17) 0.0574(13) -0.0113(13) 0.0111(9) -0.0110(12)
O23 0.0660(14) 0.0308(11) 0.0524(13) 0.0030(10) 0.0069(11) 0.0042(10)
C24 0.0327(13) 0.059(2) 0.0375(15) 0.0109(15) -0.0002(11) -0.0116(15)
C25 0.0381(15) 0.0535(19) 0.0421(17) 0.0096(14) 0.0028(12) -0.0047(14)
O26 0.0416(11) 0.098(2) 0.0394(12) 0.0119(13) 0.0009(9) 0.0024(13)
O27 0.0562(12) 0.0449(13) 0.0477(12) 0.0038(10) -0.0105(10) -0.0016(11)
O28 0.0752(17) 0.106(2) 0.0418(14) 0.0215(14) 0.0100(11) 0.0322(16)
O29 0.0740(16) 0.0771(18) 0.0473(13) 0.0120(13) 0.0063(12) 0.0238(14)

_refine_ls_extinction_method     None
_oxford_refine_ls_scale          1.171(7)
loop_
_geom_bond_atom_site_label_1
_geom_bond_site_symmetry_1
_geom_bond_atom_site_label_2
_geom_bond_site_symmetry_2
_geom_bond_distance
_geom_bond_publ_flag
N1 . C2 . 1.522(4) yes
N1 . C9 . 1.528(3) yes
N1 . C10 . 1.493(3) yes
N1 . H11 . 0.96(4) no
C2 . C3 . 1.529(4) yes
C2 . H21 . 0.977 no
C2 . H22 . 0.974 no
C3 . C4 . 1.536(4) yes
C3 . H31 . 0.974 no
C3 . H32 . 0.981 no
C4 . C5 . 1.530(4) yes
C4 . C9 . 1.534(4) yes
C4 . H41 . 0.987 no
C5 . C6 . 1.524(4) yes
C5 . H51 . 0.988 no
C5 . H52 . 0.994 no
C6 . C7 . 1.513(4) yes
C6 . O22 . 1.423(4) yes
C6 . H61 . 0.984 no
C7 . C8 . 1.517(4) yes
C7 . O21 . 1.447(3) yes
C7 . H71 . 0.969 no
C8 . C9 . 1.536(4) yes
C8 . C11 . 1.515(4) yes
C8 . H81 . 0.979 no
C9 . H91 . 0.984 no
C10 . H101 . 0.960 no
C10 . H102 . 0.966 no
C10 . H103 . 0.960 no
C11 . C12 . 1.406(4) yes
C11 . C19 . 1.399(4) yes
C12 . C13 . 1.375(4) yes
C12 . H121 . 0.936 no
C13 . O14 . 1.371(3) yes
C13 . C17 . 1.382(4) yes
O14 . C15 . 1.445(4) yes
C15 . O16 . 1.432(4) yes
C15 . H151 . 0.988 no
C15 . H152 . 0.985 no
O16 . C17 . 1.386(3) yes
C17 . C18 . 1.349(4) yes
C18 . C19 . 1.415(4) yes
C18 . H181 . 0.948 no
C19 . C20 . 1.469(4) yes
C20 . O21 . 1.346(3) yes
C20 . O23 . 1.217(4) yes
O22 . H221 . 0.83(4) no
C24 . C25 . 1.535(4) yes
C24 . O26 . 1.236(4) yes
C24 . O27 . 1.268(4) yes
C25 . O28 . 1.204(4) yes
C25 . O29 . 1.310(4) yes
O29 . H291 . 1.03(5) no
loop_
_geom_angle_atom_site_label_1
_geom_angle_site_symmetry_1
_geom_angle_atom_site_label_2
_geom_angle_site_symmetry_2
_geom_angle_atom_site_label_3
_geom_angle_site_symmetry_3
_geom_angle
_geom_angle_publ_flag
C2 . N1 . C9 . 103.4(2) yes
C2 . N1 . C10 . 112.0(2) yes
C9 . N1 . C10 . 117.4(2) yes
C2 . N1 . H11 . 105(2) no
C9 . N1 . H11 . 114(2) no
C10 . N1 . H11 . 105(2) no
N1 . C2 . C3 . 106.3(2) yes
N1 . C2 . H21 . 110.3 no
C3 . C2 . H21 . 110.6 no
N1 . C2 . H22 . 106.9 no
C3 . C2 . H22 . 110.6 no
H21 . C2 . H22 . 111.8 no
C2 . C3 . C4 . 105.6(2) yes
C2 . C3 . H31 . 109.9 no
C4 . C3 . H31 . 110.1 no
C2 . C3 . H32 . 109.8 no
C4 . C3 . H32 . 111.5 no
H31 . C3 . H32 . 109.9 no
C3 . C4 . C5 . 112.1(2) yes
C3 . C4 . C9 . 102.9(2) yes
C5 . C4 . C9 . 112.4(2) yes
C3 . C4 . H41 . 109.1 no
C5 . C4 . H41 . 111.4 no
C9 . C4 . H41 . 108.5 no
C4 . C5 . C6 . 112.9(2) yes
C4 . C5 . H51 . 107.3 no
C6 . C5 . H51 . 108.2 no
C4 . C5 . H52 . 110.6 no
C6 . C5 . H52 . 109.2 no
H51 . C5 . H52 . 108.4 no
C5 . C6 . C7 . 108.4(2) yes
C5 . C6 . O22 . 111.5(3) yes
C7 . C6 . O22 . 107.3(2) yes
C5 . C6 . H61 . 110.2 no
C7 . C6 . H61 . 109.2 no
O22 . C6 . H61 . 110.3 no
C6 . C7 . C8 . 110.7(2) yes
C6 . C7 . O21 . 107.8(2) yes
C8 . C7 . O21 . 113.2(2) yes
C6 . C7 . H71 . 110.0 no
C8 . C7 . H71 . 109.1 no
O21 . C7 . H71 . 105.9 no
C7 . C8 . C9 . 108.8(2) yes
C7 . C8 . C11 . 112.2(2) yes
C9 . C8 . C11 . 117.9(2) yes
C7 . C8 . H81 . 106.6 no
C9 . C8 . H81 . 103.7 no
C11 . C8 . H81 . 106.7 no
C8 . C9 . C4 . 112.6(2) yes
C8 . C9 . N1 . 116.8(2) yes
C4 . C9 . N1 . 101.3(2) yes
C8 . C9 . H91 . 108.6 no
C4 . C9 . H91 . 109.1 no
N1 . C9 . H91 . 108.1 no
N1 . C10 . H101 . 109.0 no
N1 . C10 . H102 . 108.0 no
H101 . C10 . H102 . 110.2 no
N1 . C10 . H103 . 108.0 no
H101 . C10 . H103 . 111.1 no
H102 . C10 . H103 . 110.4 no
C8 . C11 . C12 . 121.3(2) yes
C8 . C11 . C19 . 118.6(2) yes
C12 . C11 . C19 . 119.8(2) yes
C11 . C12 . C13 . 116.7(3) yes
C11 . C12 . H121 . 121.0 no
C13 . C12 . H121 . 122.3 no
C12 . C13 . O14 . 126.6(3) yes
C12 . C13 . C17 . 122.9(3) yes
O14 . C13 . C17 . 110.5(2) yes
C13 . O14 . C15 . 104.6(2) yes
O14 . C15 . O16 . 107.4(2) yes
O14 . C15 . H151 . 107.9 no
O16 . C15 . H151 . 109.0 no
O14 . C15 . H152 . 110.0 no
O16 . C15 . H152 . 109.8 no
H151 . C15 . H152 . 112.7 no
C15 . O16 . C17 . 105.1(2) yes
O16 . C17 . C13 . 109.2(3) yes
O16 . C17 . C18 . 128.7(3) yes
C13 . C17 . C18 . 122.1(3) yes
C17 . C18 . C19 . 116.7(3) yes
C17 . C18 . H181 . 122.6 no
C19 . C18 . H181 . 120.7 no
C18 . C19 . C11 . 121.9(2) yes
C18 . C19 . C20 . 116.9(2) yes
C11 . C19 . C20 . 121.0(2) yes
C19 . C20 . O21 . 119.3(2) yes
C19 . C20 . O23 . 123.0(3) yes
O21 . C20 . O23 . 117.6(3) yes
C7 . O21 . C20 . 119.4(2) yes
C6 . O22 . H221 . 109(3) no
C25 . C24 . O26 . 118.4(3) yes
C25 . C24 . O27 . 115.4(2) yes
O26 . C24 . O27 . 126.2(3) yes
C24 . C25 . O28 . 122.3(3) yes
C24 . C25 . O29 . 113.8(3) yes
O28 . C25 . O29 . 123.8(3) yes
C25 . O29 . H291 . 109(3) no


#------------------------------------------------------------------------------
loop_
_geom_contact_atom_site_label_1
_geom_contact_atom_site_label_2
_geom_contact_distance
_geom_contact_site_symmetry_1
_geom_contact_site_symmetry_2
_geom_contact_publ_flag
O14 O22 3.113(3) . 2_646 no
O14 O21 3.171(3) . 2_646 no
O14 C18 3.304(4) . 2_546 no
O14 C20 3.433(3) . 2_646 no
O14 C17 3.537(3) . 2_546 no
O16 C10 3.329(4) . 2_556 no
O21 C15 3.307(4) . 2_656 no
O21 C3 3.575(4) . 1_565 no
O22 O26 2.734(3) . 1_655 no
O22 C15 3.033(4) . 2_656 no
O22 C24 3.486(4) . 1_655 no
O22 O29 3.535(4) . 1_655 no
O23 C9 3.287(4) . 1_565 no
O23 C13 3.347(3) . 2_656 no
O23 C12 3.354(4) . 1_565 no
O23 C10 3.416(4) . 1_565 no
O23 C12 3.464(3) . 2_656 no
O26 C7 3.243(3) . . no
O26 C10 3.432(4) . . no
O26 N1 3.473(4) . . no
O27 O29 2.641(4) . 2_545 no
O27 N1 2.803(3) . . no
O27 O28 3.115(4) . 2_545 no
O27 C25 3.252(4) . 2_545 no
O27 C2 3.391(4) . . no
O27 C10 3.436(4) . . no
O27 C5 3.437(4) . . no
O27 C7 3.489(3) . . no
O28 O29 3.091(4) . 2_545 no
O28 C5 3.354(4) . 2_655 no
O28 C10 3.415(4) . 2 no
O28 C24 3.549(5) . 2 no
O28 C2 3.554(4) . 2 no
O28 C4 3.573(4) . 2_655 no
O28 C3 3.585(4) . 2_655 no
O29 C6 3.389(4) . 1_455 no
O29 C24 3.409(4) . 2 no
O29 C25 3.508(4) . 2 no
N1 C24 3.480(4) . . no
C12 C20 3.525(4) . 2_646 no
C13 C20 3.391(4) . 2_646 no
C15 C18 3.510(4) . 2_546 no
#------------------------------------------------------------------------------
loop_
_geom_torsion_atom_site_label_1
_geom_torsion_atom_site_label_2
_geom_torsion_atom_site_label_3
_geom_torsion_atom_site_label_4
_geom_torsion_site_symmetry_1
_geom_torsion_site_symmetry_2
_geom_torsion_site_symmetry_3
_geom_torsion_site_symmetry_4
_geom_torsion
_geom_torsion_publ_flag
O14 C13 C12 C11 . . . . 179.0(2) no
O14 C13 C17 O16 . . . . -0.2(3) no
O14 C13 C17 C18 . . . . -179.8(2) no
O14 C15 O16 C17 . . . . -17.4(3) no
O16 C15 O14 C13 . . . . 17.2(3) no
O16 C17 C13 C12 . . . . 179.4(2) no
O16 C17 C18 C19 . . . . -179.2(2) no
O21 C7 C6 O22 . . . . 67.2(3) no
O21 C7 C6 C5 . . . . -172.4(2) no
O21 C7 C8 C9 . . . . 176.2(2) no
O21 C7 C8 C11 . . . . 43.8(3) no
O21 C20 C19 C11 . . . . 2.8(4) no
O21 C20 C19 C18 . . . . 177.8(2) no
O22 C6 C5 C4 . . . . 61.7(3) no
O22 C6 C7 C8 . . . . -57.1(3) no
O23 C20 O21 C7 . . . . -161.5(2) no
O23 C20 C19 C11 . . . . -174.7(2) no
O23 C20 C19 C18 . . . . 0.3(4) no
O26 C24 C25 O28 . . . . 169.1(3) no
O26 C24 C25 O29 . . . . -12.4(4) no
O27 C24 C25 O28 . . . . -9.5(5) no
O27 C24 C25 O29 . . . . 169.0(3) no
N1 C2 C3 C4 . . . . -0.7(3) no
N1 C9 C4 C3 . . . . -43.3(3) no
N1 C9 C4 C5 . . . . 77.5(3) no
N1 C9 C8 C7 . . . . -62.4(3) no
N1 C9 C8 C11 . . . . 66.9(3) no
C2 N1 C9 C4 . . . . 43.0(3) no
C2 N1 C9 C8 . . . . 165.7(2) no
C2 C3 C4 C5 . . . . -93.7(3) no
C2 C3 C4 C9 . . . . 27.2(3) no
C3 C2 N1 C9 . . . . -26.4(3) no
C3 C2 N1 C10 . . . . -153.7(2) no
C3 C4 C5 C6 . . . . 164.5(3) no
C3 C4 C9 C8 . . . . -168.8(2) no
C4 C5 C6 C7 . . . . -56.0(3) no
C4 C9 N1 C10 . . . . 166.9(2) no
C4 C9 C8 C7 . . . . 54.2(3) no
C4 C9 C8 C11 . . . . -176.5(2) no
C5 C4 C9 C8 . . . . -48.1(3) no
C5 C6 C7 C8 . . . . 63.4(3) no
C6 C5 C4 C9 . . . . 49.2(3) no
C6 C7 O21 C20 . . . . -167.5(2) no
C6 C7 C8 C9 . . . . -62.7(3) no
C6 C7 C8 C11 . . . . 165.0(2) no
C7 O21 C20 C19 . . . . 20.9(3) no
C7 C8 C11 C12 . . . . 163.2(2) no
C7 C8 C11 C19 . . . . -22.7(3) no
C8 C7 O21 C20 . . . . -44.7(3) no
C8 C9 N1 C10 . . . . -70.4(3) no
C8 C11 C12 C13 . . . . 175.1(2) no
C8 C11 C19 C18 . . . . -175.2(2) no
C8 C11 C19 C20 . . . . -0.5(3) no
C9 C8 C11 C12 . . . . 35.5(3) no
C9 C8 C11 C19 . . . . -150.4(2) no
C11 C12 C13 C17 . . . . -0.6(4) no
C11 C19 C18 C17 . . . . 0.3(4) no
C12 C11 C19 C18 . . . . -1.1(4) no
C12 C11 C19 C20 . . . . 173.7(2) no
C12 C13 O14 C15 . . . . 169.8(3) no
C12 C13 C17 C18 . . . . -0.2(4) no
C13 C12 C11 C19 . . . . 1.2(3) no
C13 C17 O16 C15 . . . . 11.0(3) no
C13 C17 C18 C19 . . . . 0.3(4) no
C15 O14 C13 C17 . . . . -10.6(3) no
C15 O16 C17 C18 . . . . -169.4(3) no
C17 C18 C19 C20 . . . . -174.6(2) no
#------------------------------------------------------------------------------


loop_
_geom_hbond_atom_site_label_D
_geom_hbond_site_symmetry_D
_geom_hbond_atom_site_label_H
_geom_hbond_site_symmetry_H
_geom_hbond_atom_site_label_A
_geom_hbond_site_symmetry_A
_geom_hbond_angle_DHA
_geom_hbond_distance_DH
_geom_hbond_distance_HA
_geom_hbond_distance_DA
_geom_hbond_publ_flag
N1 . H11 . O27 . 166(3) 0.96(4) 1.86(3) 2.803(4) no
O22 . H221 . O26 1_655 169(5) 0.83(4) 1.91(4) 2.733(4) no
O29 . H291 . O27 2_555 172(4) 1.03(5) 1.62(5) 2.641(4) no


#===END
